# Supplementary material for: Goal-concordant care in the ICU: a conceptual framework for future research
Source: PubMed Central journal article supplement — Intensive Care Med. 2017 Jun 27;43(12):1847–9. doi: 10.1007/s00134-017-4873-2 (PMC5717114; doi:10.1007/s00134-017-4873-2), 2017-06-27
Supplement: 134_2017_4873_MOESM1_ESM.pdf [file 134_2017_4873_MOESM1_ESM.pdf]

# Table S1: Examples of how measuring goal concordance could be used in research

## 1. Calculating cumulative incidence

- No. of preference sensitive treatments this month = 48
- No. of treatments rated as goal discordant = 15

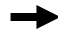

$(15/48) \times 100 = 32.3$  discordant treatments per 100 preference-sensitive interventions  
**95% CI = (19.1 - 46.4)**

**Note:** If patients receive multiple preference-sensitive treatments, observations are not independent and statistics should account for correlation within patients.

## 2. Calculating intervention-specific rates

Research team identifies 4 preference-sensitive interventions of interest. Based on results at right, they decide to focused their intervention on tracheostomies and endoscopy.

Discordant treatments per 100 performed (95% CI) →

|  | Long-term dialysis catheter (N = 22) | Tracheostomy (N = 19) | Endoscopy (N = 39) | Suprapubic urinary catheter (N = 6) |
|--|--------------------------------------|-----------------------|--------------------|-------------------------------------|
|  | 9 (2—31)                             | 47 (25—71)            | 26 (14—42)         | 33 (6—76)                           |

## 3. Assessing goal-concordance to tailor interventions

It may be difficult for **ICU A** to increase goal-concordance since some proxies will always set unachievable goals or be unsure of treatment limitations.

In **ICU B**, most goals are potentially achievable, but there are many uncertain proxies. Consider a facilitated values history<sup>a</sup> intervention.

In **ICU C**, an intervention to help physicians communicate prognosis may be the best approach to improving the rate of goal-concordant care given the sizable percentage patients and proxies naming unachievable goals. Investigating the source of treatment limitation violations is also advised.

|                                                        | ICU A<br>N = 212 | ICU B<br>N = 303 | ICU C<br>N = 174 |
|--------------------------------------------------------|------------------|------------------|------------------|
| <b>Preference-sensitive interventions January—June</b> |                  |                  |                  |
| Goal—concordant                                        | 65%              | 55%              | 38%              |
| Goal unachievable at time of intervention              | 10%              | 7%               | 25%              |
| Proxy unsure of goal or treatment limitations          | 10%              | 23%              | 3%               |
| Treatment will not help achieve the patient’s goal     | 2%               | 2%               | 5%               |
| Treatment limitation violated                          | 1%               | 3%               | 9%               |
| Patient lacks capacity, no proxy identified            | 12%              | 10%              | 20%              |

## 4. Longitudinal assessment during an intervention

A research team tracks the incidence of goal-discordant treatment during a year long, before-and-after study. The dashed red lines indicate the beginning and end of the intervention period. The rate of goal-discordant treatment drops during the intervention, and then rebounds slightly after month 9. The number of preference-sensitive interventions performed during the intervention also decreased which resulted in larger confidence intervals in the post-intervention period.

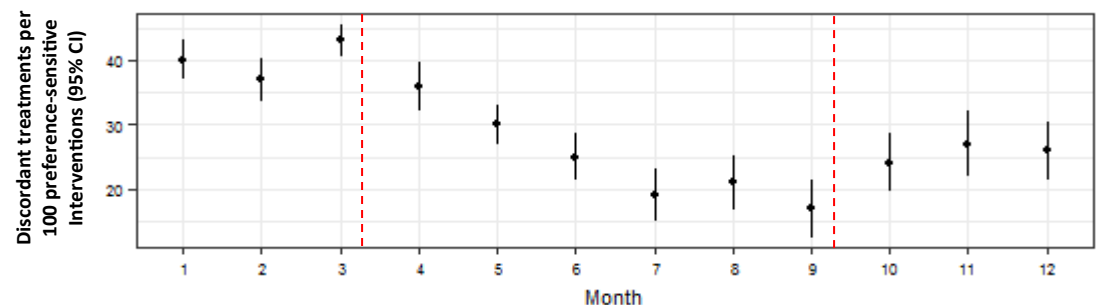

## 5. Cluster-randomized trial of a complex intervention

ICUs are randomized to control or intervention after a 3 month baseline period. The research team prospectively asks patients and proxies about goals and treatment limitations in both groups to track goal-concordance. Simply asking about goals and treatment limitations appears to have raised the incidence of goal-concordant treatment in the control ICUs (red), but the treatment ICUs (blue) show an even greater increase in the rate of goal-concordant treatment suggesting that the intervention had an independent effect.

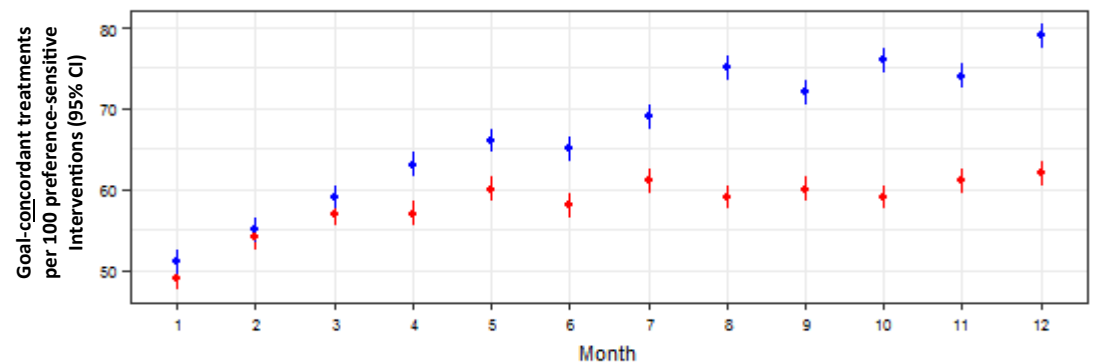

a. Scheunemann LP, Arnold RM, White DB. The Facilitated Values History. Am J Respir Crit Care Med. 2012;186:480–6.

**Table S2: Assessing goal-concordance for 5 hypothetical ICU patients**

| Patient and Treatment                                                                                                                                                                                                                                                                                               | Goal                                                                                                               | Treatment Limitations                                                             | Goal potentially achievable at the time of the treatment? | Treatment helps achieve the goal and respects the patient's treatment limitations?                                                                                                     | Goal-concordant care? |
|---------------------------------------------------------------------------------------------------------------------------------------------------------------------------------------------------------------------------------------------------------------------------------------------------------------------|--------------------------------------------------------------------------------------------------------------------|-----------------------------------------------------------------------------------|-----------------------------------------------------------|----------------------------------------------------------------------------------------------------------------------------------------------------------------------------------------|-----------------------|
| <p><b>Patient 1:</b> 47 y.o. male with hypertension and diabetes mellitus type II admitted with small bowel obstruction due to adhesions, status post small bowel resection. On post-operative day 2, he has septic shock and is oliguric.</p> <p><b>Treatment:</b> Continuous Renal Replacement Therapy (CRRT)</p> | <p>"He wants to get back to work and to being a father."</p> <p>- patient's wife</p>                               | <p>None<br/>(Full code)</p>                                                       | <p><b>Yes</b><br/>(physician judgement)</p>               | <p><b>Yes</b><br/>There's a good chance his kidney failure will resolve and CRRT provides time for him to recover.</p>                                                                 | <p><b>Yes</b></p>     |
| <p><b>Patient 2:</b> 68 y.o. woman with multiple comorbidities who has severe necrotizing pneumonia and ICU-acquired muscle weakness with 14 days of mechanical ventilation.</p> <p><b>Treatment:</b> Tracheostomy</p>                                                                                              | <p>"I want to be at my daughter's wedding in the spring."</p> <p>- patient</p>                                     | <p>"Try to help me get better, but if my heart stops don't do CPR."<br/>(DNR)</p> | <p><b>Yes</b><br/>(physician judgement)</p>               | <p><b>Yes</b><br/>Tracheostomy will allow continued mechanical ventilation which increases her chances of attending the wedding.</p>                                                   | <p><b>Yes</b></p>     |
| <p><b>Patient 3:</b> 37 y.o. male with leukemia status post 2 failed bone marrow transplants admitted with renal failure due to persistent diarrhea secondary to graft-versus-host-disease and severe pneumonia.</p> <p><b>Treatment:</b> Re-intubation and peripherally inserted central catheter (PICC)</p>       | <p>"I want to be comfortable and in my own home."</p> <p>- patient</p>                                             | <p>"Don't intubate me again. If I'm dying let me go."<br/>(DNR/DNI)</p>           | <p><b>Yes</b><br/>(physician judgement)</p>               | <p><b>No</b><br/>Re-intubation violates his treatment limitation and a PICC will not help achieve the patient's goal. All appropriate medications can be given via a non-IV route.</p> | <p><b>No</b></p>      |
| <p><b>Patient 4:</b> 71 y.o. male with end-stage interstitial lung disease and progressive hypoxia despite 14 days of ventilator support. He is not a transplant candidate.</p> <p><b>Treatment:</b> Tracheostomy</p>                                                                                               | <p>"Beat my ILD and hike in the mountains next summer."</p> <p>- patient</p>                                       | <p>None<br/>(Full code)</p>                                                       | <p><b>No</b><br/>(physician judgement)</p>                | <p><b>No</b><br/>A tracheostomy will not improve this patient's chances of achieving his stated goal.</p>                                                                              | <p><b>No</b></p>      |
| <p><b>Patient 5:</b> 87 y.o. female with advanced dementia admitted 1 week ago with ARDS secondary to influenza and MRSA pneumonia (ventilator settings: AC/400/25/30%/5). She has developed renal failure and is receiving intermittent hemodialysis.</p> <p><b>Treatment:</b> Long term dialysis catheter</p>     | <p>"She'd definitely want to be alive. She wouldn't mind living in a nursing facility."</p> <p>- patient's son</p> | <p>None<br/>(Full code)</p>                                                       | <p><b>Yes</b><br/>(physician judgement)</p>               | <p><b>Yes</b><br/>A long-term dialysis catheter could allow this patient to be discharged to a long-term care facility.</p>                                                            | <p><b>Yes</b></p>     |
